# Supplementary material for: Prevalence of frailty in patients with non-cirrhotic non-alcoholic fatty liver disease
Source: PubMed Central journal article supplement — BMJ Open Gastroenterol. 2022 May 6;9(1):e000861. doi: 10.1136/bmjgast-2021-000861 (PMC9083434; doi:10.1136/bmjgast-2021-000861), 2022-05-06
Supplement: bmjgast-2021-000861supp001.pdf [file bmjgast-2021-000861supp001.pdf]

## The prevalence of frailty in patients with non-cirrhotic non-alcoholic fatty liver disease

### Authors and Affiliations

Sara Naimimohasses<sup>1,2\*</sup>, Philip O’Gorman<sup>3\*</sup>, Emma McCormick<sup>1</sup>, Damien Ferguson<sup>2,4</sup>, Ann Monaghan<sup>3</sup>, Marie McGrath<sup>1</sup>, Mark Robinson<sup>5</sup>, John Gormley<sup>3</sup> and Suzanne Norris<sup>1,2</sup>

<sup>1</sup>*Department of Hepatology, St James’s Hospital, Dublin, Ireland*

<sup>2</sup>*Department of Clinical Medicine, Trinity College Dublin, Dublin, Ireland*

<sup>3</sup>*Discipline of Physiotherapy, Trinity College Dublin, Dublin, Ireland*

<sup>4</sup>*Academic Unit of Neurology, Trinity College Dublin, Dublin, Ireland*

<sup>5</sup>*Kathleen Lonsdale Institute for Human Health Research, Maynooth University, Kildare, Ireland*

*\*Sara Naimimohasses and Philip O’Gorman contributed equally.*

**Corresponding Author:** Professor Suzanne Norris, Department of Hepatology, St James’s Hospital, Dublin, Ireland. Email: [snorris@tcd.ie](mailto:snorris@tcd.ie)

|                                                                                            |   |
|--------------------------------------------------------------------------------------------|---|
| <b>Supplementary Methods</b> .....                                                         | 2 |
| <i>Self-reported frailty index (SRFI) questionnaire</i> .....                              | 2 |
| <i>Lab-based frailty index (FI-LAB) standardised blood tests</i> .....                     | 3 |
| <b>Supplementary Table 1: Multivariate linear regression predicting SRFI score</b> .....   | 4 |
| <b>Supplementary Table 2: Multivariate linear regression predicting FI-LAB score</b> ..... | 5 |
| <b>Supplementary Table 3: Multivariate linear regression predicting 30STST score</b> ..... | 6 |

## Supplementary Methods

*Self-reported frailty index (SRFI) questionnaire*

| <b>Do you suffer from any of the following?</b>                  | <b>YES</b> | <b>NO</b> |
|------------------------------------------------------------------|------------|-----------|
| 1. Difficulty walking 100m or 100 yards                          |            |           |
| 2. Difficulty rising from chair                                  |            |           |
| 3. Difficulty climbing one flight of stairs                      |            |           |
| 4. Difficulty stooping, kneeling or crouching                    |            |           |
| 5. Difficulty reaching above shoulder height                     |            |           |
| 6. Difficulty pushing/pulling large objects                      |            |           |
| 7. Difficulty lifting/carrying weights $\geq 10$ pounds or 4.5kg |            |           |
| 8. Difficulty picking up a coin from table                       |            |           |
| 9. Difficulty getting dressed or bathing                         |            |           |
| 10. Feeling lonely                                               |            |           |
| 11. Mood Problems                                                |            |           |
| 12. Constant tiredness                                           |            |           |
| 13. Poor Sleep Quality                                           |            |           |
| 14. Poor physical health                                         |            |           |
| 15. Poor vision                                                  |            |           |
| 16. Poor hearing                                                 |            |           |
| 17. Difficulty following a conversation                          |            |           |
| 18. Daytime sleepiness                                           |            |           |
| 19. Knee pain                                                    |            |           |
| 20. A history of 1 or more falls in the past year                |            |           |
| 21. A history of 1 or more broken bones in the past year         |            |           |
| 22. Taking more than 5 different medications                     |            |           |
| 23. Poor memory                                                  |            |           |
| 24. Absent mindedness                                            |            |           |

| <b>Has a medical professional diagnosed you with any of the following?</b> | <b>YES</b> | <b>NO</b> |
|----------------------------------------------------------------------------|------------|-----------|
| 1. Urinary incontinence                                                    |            |           |
| 2. Gastrointestinal problems                                               |            |           |
| 3. Lung or respiratory problems                                            |            |           |
| 4. High blood pressure                                                     |            |           |
| 5. Angina                                                                  |            |           |
| 6. Heart attack                                                            |            |           |
| 7. Diabetes                                                                |            |           |
| 8. Hypo/Hyperthyroidism                                                    |            |           |
| 9. Stroke/Transient ischemic attack                                        |            |           |
| 10. High cholesterol                                                       |            |           |
| 11. Irregular heart rhythm                                                 |            |           |
| 12. Other heart problems                                                   |            |           |
| 13. Cataracts                                                              |            |           |
| 14. Glaucoma/Age related macular degeneration                              |            |           |
| 15. Arthritis                                                              |            |           |

|                                                     |  |  |
|-----------------------------------------------------|--|--|
| 16. Osteoporosis                                    |  |  |
| 17. Cancer                                          |  |  |
| 18. Varicose ulcer                                  |  |  |
| 19. Cognitive Impairment/Cognitive Related Problems |  |  |
| 20. Other health problems (please specify):         |  |  |

*Lab-based frailty index (FI-LAB) standardised blood tests*

| Variables included in the FI-LAB: |                                                   |    |                                             |
|-----------------------------------|---------------------------------------------------|----|---------------------------------------------|
| 1                                 | White Cell Count                                  | 19 | Estimated Glomerular Filtration Rate (eGFR) |
| 2                                 | Neutrophil Count                                  | 20 | Total Protein                               |
| 3                                 | Lymphocyte Count                                  | 21 | Albumin                                     |
| 4                                 | Monocyte Count                                    | 22 | Total Bilirubin                             |
| 5                                 | Eosinophil Count                                  | 23 | Alkaline Phosphatase                        |
| 6                                 | Basophil Count                                    | 24 | Gamma Glutamyl Transferase (GGT)            |
| 7                                 | Red cell count (RCC)                              | 25 | Aspartate Transferase (AST)                 |
| 8                                 | Haemoglobin                                       | 26 | Alanine Transferase (ALT)                   |
| 9                                 | Haematocrit (HCT)                                 | 27 | Glucose                                     |
| 10                                | Mean Corpuscular Volume (MCV)                     | 28 | Glycated Haemoglobin (HbA1C)                |
| 11                                | Mean Corpuscular Haemoglobin (MCH)                | 29 | Urate                                       |
| 12                                | Mean Corpuscular Haemoglobin Concentration (MCHC) | 30 | Total Cholesterol                           |
| 13                                | Red Cell Distribution Width (RDW)                 | 31 | High-Density Lipoprotein (HDL)              |
| 14                                | Platelet Count                                    | 32 | Triacylglycerol (TAG)                       |
| 15                                | Erythrocyte Sedimentation Rate (ESR)              | 33 | C-Reactive Protein (CRP)                    |
| 16                                | Urea                                              | 34 | Insulin                                     |
| 17                                | Sodium                                            | 35 | Potassium                                   |
| 18                                | Creatinine                                        |    |                                             |

Supplementary Table 1: Multivariate linear regression predicting SRFI score

| Variable                 | B (Std. Error) | t value | p-value         |
|--------------------------|----------------|---------|-----------------|
| Constant                 | -0.26 (0.09)   | -2.877  | <b>0.005 **</b> |
| CAP (dB/m)               | 0.001 (0)      | 2.969   | <b>0.004 **</b> |
| LSM (kPa)                | 0 (0.002)      | 0.1     | 0.921           |
| Gender                   | 0.064 (0.02)   | 3.106   | <b>0.003 **</b> |
| Smoking History          | -0.003 (0.016) | -0.171  | 0.864           |
| Diabetes                 | 0.039 (0.021)  | 1.875   | 0.064           |
| Hypercholesteremia       | 0.051 (0.021)  | 2.372   | <b>0.02 *</b>   |
| Hypertension             | 0.034 (0.022)  | 1.581   | 0.117           |
| Age (years)              | 0.002 (0.001)  | 1.98    | 0.051           |
| BMI (kg/m <sup>2</sup> ) | 0.001 (0.002)  | 0.716   | 0.476           |

Dependent variable is SRFI score. SRFI = Self-reported frailty index, CAP = controlled attenuation parameter, LSM = Liver stiffness measurement, BMI = body mass index. \*,  $p < 0.05$ ; \*\*,  $p < 0.01$ .

Supplementary Table 2: Multivariate linear regression predicting FI-LAB score

| Variable                 | B (Std. Error) | t value | p-value         |
|--------------------------|----------------|---------|-----------------|
| Constant                 | 0.048 (0.072)  | 0.67    | 0.504           |
| CAP (dB/m)               | 0 (0)          | 0.721   | 0.472           |
| LSM (kPa)                | 0.002 (0.001)  | 1.662   | 0.1             |
| Gender                   | 0.046 (0.016)  | 2.835   | <b>0.006 **</b> |
| Smoking History          | 0.005 (0.012)  | 0.436   | 0.664           |
| Diabetes                 | 0.03 (0.016)   | 1.791   | 0.077           |
| Hypercholesteremia       | 0.024 (0.017)  | 1.434   | 0.155           |
| Hypertension             | 0.019 (0.017)  | 1.119   | 0.266           |
| Age (years)              | 0 (0.001)      | 0.434   | 0.665           |
| BMI (kg/m <sup>2</sup> ) | 0 (0.001)      | -0.129  | 0.897           |

Dependent variable is FI-LAB score. FI-LAB = lab-based frailty index, CAP = controlled attenuation parameter, LSM = Liver stiffness measurement, BMI = body mass index. \*\*,  $p < 0.01$ .

Supplementary Table 3: Multivariate linear regression predicting 30STST score

| Variable                 | B (Std. Error) | t value | p-value          |
|--------------------------|----------------|---------|------------------|
| Constant                 | 26.353 (3.944) | 6.681   | <b>0.000 ***</b> |
| CAP (dB/m)               | 0.009 (0.010)  | 0.916   | 0.363            |
| LSM (kPa)                | -0.080 (0.101) | -0.788  | 0.433            |
| Gender                   | -2.578 (0.929) | -2.777  | <b>0.007 **</b>  |
| Smoking History          | -1.458 (0.732) | -1.991  | 0.050            |
| Diabetes                 | -1.564 (0.991) | -1.578  | 0.119            |
| Hypercholesteremia       | 0.182 (1.023)  | 0.177   | 0.860            |
| Hypertension             | 1.162 (0.971)  | 1.196   | 0.236            |
| Age (years)              | -0.111 (0.041) | -2.708  | <b>0.008 **</b>  |
| BMI (kg/m <sup>2</sup> ) | -0.161 (0.086) | -1.885  | 0.063            |

Dependent variable is 30STST score. 30STST = 30-second sit-to-stand, CAP = controlled attenuation parameter, LSM = Liver stiffness measurement, BMI = body mass index. \*\*,  $p < 0.01$ ; \*\*\*,  $p < 0.001$ .
